# Supplementary material for: Profile
Source: Royal Society of Chemistry journal article supplement (doi:10.1039/b304864k), 2003-01-01
Supplement: interview.doc [file interview.doc]

This Journal is © The Royal Society of Chemistry 2003

**Interview with Professor Paul Yager**

**Department of Bioengineering, University of Washington,**

**Seattle, WA 98195-2255, USA**

- What is your educational background?

A.B. from Princeton in Biochemistry, 1975

Ph.D in Chemistry, University of Oregon, thesis on Raman spectroscopy of biological molecules, particularly lipids.

- How did you get into this field of micro/bio…….?

Being a Raman spectroscopist of biological molecules, I had been chasing down a few photons of signal buried in a lot of noise from absorbance, elastic light scattering, and fluorescence, and working with tiny samples. One eventually becomes an expert at small tricks for looking at very few biomolecules. It is a small step to become a biosensor developer. I also had a student who introduced me to silicon microfabrication in the late 1980’s as part of development of a lipid bilayer-based biosensor. By the 1990’s the pieces were all in place—it was just a matter of time for me to realize they were there and start putting them together.

- Talk us through some of the most significant/valuable (to the community) research you have done in the past.

1. **Development of Raman spectroscopy as a tool for study of biomembrane systems**. Beginning in undergraduate research in the Spiro laboratory at Princeton and continuing through graduate work in the Peticolas laboratory at the University of Oregon, I performed some of the earliest work on the use of Raman spectroscopy to study biological molecules. Before the development of a practical fast Fourier transform, Raman spectroscopy was superior to infrared spectroscopy for the study of conformation and crystal packing of such molecules as lipids and proteins, largely because of its relative insensitivity to the presence of water. I focused on the development of selective isotopic labeling (using deuterium) to allow monitoring of the conformation of particular portions of lipid molecules, or particular species of phospholipids in mixtures of lipid types. This work culminated in a series of studies on the nature and rates of phase transitions of hydrated phospholipids as models of biomembranes. The work as a whole contributed to the establishment of the basic physical chemistry of complex self-organized lipids.

2. **Discovery of lipid tubules and other complex high axial ratio microstructures (CHARMs)**. While a postdoctoral fellow at the Naval Research Laboratory, Schoen and I discovered that phospholipids with diacetylenic hydrocarbon chains could spontaneously form hollow cylindrical microstructures. These microstructures, which were named lipid tubules, were the first phospholipid microstructure identified other than liposomes and cochleate cylinders. Since 1982 a very wide range of chiral 2-chain surfactants lipids have been demonstrated, under the right circumstances, to form non-liposomal microstructures. Collectively the tubules, helical ribbons, twisted ribbons and cochleate cylinders were named complex high axial ratio microstructures (CHARMs). In most cases these microstructures are the thermodynamically stable state—a fact that has attracted many theorists to the field. In recent years, CHARM work in my laboratory has focused on their use in continuous delivery of therapeutic substances, generally through controlled hydrolysis of prodrugs covalently attached to the headgroups of the CHARM-forming core lipids. It has been demonstrated that these microstructures afford great protection of labile groups from enzymatic and nonenzymatic hydrolysis.

3. **Development of processes and microdevices for manipulation of fluids in low Reynolds number regimes**. Since 1992 we have, in my lab been using microfabrication to develop methods for processing and analyzing small volumes of fluids. Two main applications for this technology now focus the work from my laboratory—development of inexpensive sophisticated point-of-care biomedical diagnostic instrumentation, and the development of a versatile reconfigurable format for laboratory research. While much work in microfluidics has centered on overcoming the poor performance of macroscopic processes in microdevices, the work from my laboratory has focused on exploiting unique features of transport in small channels. Initial work focused on the use of diffusion perpendicular to the flow in silicon microchannels as method for controlled extraction of rapidly diffusing species from complex mixtures (the H-filter). The interaction of labeled species in such microchannels can also be used measure concentrations of unknown analytes ranging from small molecules to large proteins (T-sensor). Notable is the recent demonstration of a very rapid immunoassay based on the T-sensor. Work continues on the development of continuous separation and concentration methods using fields applied transverse to pumped flow; both electrophoresis and isoelectric focusing have been used to concentrate and fractionate bacteria and proteins. This work has been embodied in silicon microdevices, and, more recently, in polymeric laminate devices that lend themselves to both rapid prototyping and high volume production.

- What is your current area of research?

Today we are currently focused on development of inexpensive, simple, robust and sophisticated point-of-care diagnostic tools for medicine. The core technology is microfluidics with optical detection methods, generally implemented using polymeric laminate-based microfluidic circuitry. Right now we are heavily invested in development of novel microfluidic immunoassays, and in surface plasmon resonance microscopy as a potentially low-cost analytical method to couple with the polymeric laminates. We are also pursuing the preservation and delivery of reagents for use in these systems, and the use of saliva as an analyte.

- Why is it important? How will it benefit the field/community?

While we’re working in several related areas, the central theme today is immunoassay development. One of the most powerful and versatile biomedical diagnostic tools, the immunoassay, is used to monitor the levels of drugs and hormones in body fluids, to diagnose infectious and autoimmune diseases, and to both diagnose and monitor treatment of cancer. The performance of immunoassays is today largely restricted to centralized laboratories because of the need for long assay times, complex and expensive equipment, and highly trained technicians. If a wider range of the 700 million immunoassays performed annually in the US alone could be run more inexpensively, more frequently, and *at the point of care*, the health of millions of patients could be improved. Recent developments in microfluidics suggest that instruments could soon be developed that would allow immunoassays to be performed as easily as is blood glucose testing today.

On a broader level the creation of a distributed diagnosis and home healthcare system has the potential to revolutionize medicine. For further ranting on this topic, see my www site (<http://faculty.washington.edu/yagerp>).

- If you had all the money you required, what other projects/research would you be involved in?

None—I’d do the ones I’m now working on faster. I would want to work more closely with the sorts of people and companies that can implement the overall healthcare systems changes I think need to accompany the availability of the point-of-care diagnostics.

- What is the most important aspect/value of micro/nano technology?

It could be the ability to move types of chemical/biochemical/biological measurements to places they cannot now be performed, and into situations that preclude the use of trained technicians to perform and analyze the data.

- Does this field have a future and why?

Oh, yeah. It has become clear that many big companies, including ones with no current investment into medicine, and certainly not into chemical diagnostics, have realized that medicine is the growth market for the 21st century. The availability of IT infrastructure and market acceptance of putting your life on a PDA has made the distribution of medical intelligence an obvious next step.

- What future directions do you envisage for your research?

We’re on what we hope will be a steady track toward implementation of many of the ideas we’ve been working on in the laboratory toward this idea of distributed diagnosis and home healthcare (D2H2).

- What funding problems do you have?

None at the moment, which is a somewhat unsettling feeling, just like having too little money, except you have this feeling with more students watching you.

- As an academic, do you have sufficient time for research?

As an academic, I never have enough time for anything or anyone. You do what you can and keep your eye on the big picture as much as possible.

- What is the situation with students; is it becoming easier or more difficult to find doctoral and post docs with relevant backgrounds?

Living in a Bioengineering program as I do at UW, we have access to some extraordinarily talented students. Furthermore, they come from very varied backgrounds. Right now I have graduate students with undergrad degrees in MechE, ChemE, EE, BioE, Computer Science, Chemistry, Molecular Biology and Biology. This is just about right for a very multidisciplinary set of projects. We are like a small university in ourselves.

- What is the situation with recruiting students to chem/bio/phys/electronics at your institution?

Right now at UW, BioE is doing very well in recruiting excellent students at all levels. We have a constant flood of postdoc applications, particularly now with the commercial sector undergoing retrenchment. We are generally limited by space or money, not by applicants.

- What are the major bottlenecks in miniaturisation at present?

In the biomedical diagnostics field today, as Manz pointed out some years ago, the problem is not miniaturization of instrumentation, but the low numbers of analytes in a small drop of biological fluid sample. On the other hand, the major challenge that we’re pursuing is reducing end-user cost without sacrificing precision and sensitivity and portability of both the microfluidics components as well as of the oh-so-important support equipment that must go with the disposable microfluidics parts.

- Which are the main journals you contribute miniaturisation research to and why?

In addition to this journal, we publish a lot in *Analytical Chemistry*, *Biophysical Journal*, and *Nature Biotechnology*.

- What are the major problems for miniaturisation at the moment?

See above

- There are now several conferences that deal specifically with miniaturisation issues, where a lot of work is presented, but not much finds its way into refereed mainstream journals. Why do you think this is? Is the same work being touted everywhere?

Yes, there are too many meetings (largely because of unfocused investor and industrial interest) at which too many people are touting their latest patented technology. I personally am happy to have been an attendee at the first Physics and Chemistry of Microfluidics Gordon Conference. I hope that becomes a central meeting for the field, along with µTAS and not too many others.

- What do you think of the *Lab on a Chip* journal?

The articles are uniformly interesting, relevant, and timely. All my students scan every issue.
